# Supplementary material
Source: MDPI journal article supplement (https://www.mdpi.com/2227-9040/11/3/198)

## Supplementary Information

# Electrochemical Behavior and Voltammetric Determination of two synthetic aroyl amides opioids.

**Andrea Capucciati,<sup>a</sup> Anna Burato <sup>a</sup>, Stefano Protti,<sup>b</sup> Chiara Bersani, <sup>a</sup> Antonella Profumo,<sup>a</sup>**

**Daniele Merli <sup>a,c\*</sup>**

<sup>a</sup> *Department of Chemistry, University of Pavia, Viale Taramelli 10, 27100 Pavia, ITALY.*

<sup>b</sup> *PhotoGreen Lab, Department of Chemistry, University of Pavia, Viale Taramelli 12, 27100 Pavia, ITALY*

<sup>c</sup> *INFN Sezione di Milano-Bicocca, Piazza della Scienza 3, 20126 Milano, ITALY*

\* Corresponding author. Tel.: +39 0382 987581; fax: +39 0382 528544.

E-mail address: [daniele.merli@unipv.it](mailto:daniele.merli@unipv.it).

### Table of Contents

|                                                               |            |
|---------------------------------------------------------------|------------|
| <b>1. Abbreviations</b>                                       | <b>S2</b>  |
| <b>2. Characterization data for the synthesized compounds</b> | <b>S3</b>  |
| <b>3. Cyclic voltammograms and related data</b>               | <b>S4</b>  |
| <b>4. Electrochemical determination of aryl amides</b>        | <b>S9</b>  |
| <b>5. Synthetic urine composition</b>                         | <b>S12</b> |

## 1. Abbreviations

U-47700: 3,4-dichloro-N-[2-(dimethylamino)ciclohexyl]-N-methyl-benzamide

AH-7921: 3,4-Dicloro-N-[[1-(dimetilammino)cicloesil]metil]benzamide

CV: cyclic voltammetry

CPE: exhaustive coulometry by controlled potential electrolysis

DPV: pulsed differential voltammetry

$\nu$ : scan speed (V/s)

$E_p$ : peak potential (V)

$i_p$ : peak intensity (A)

RECY: recovery factor

## 2. Characterization of the examined compounds.

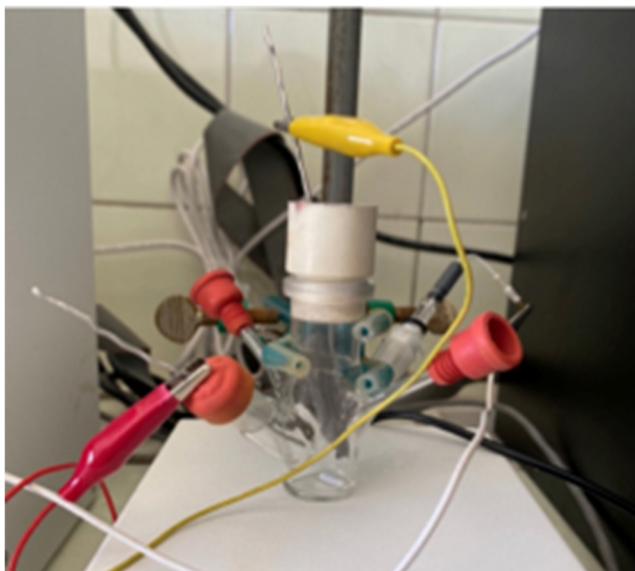

**Figure S1.** *The three-electrode cell used in the CPE experiments.*

### 3. Cyclic voltammograms and related data

*Exhaustive electrolysis of U-47700 and of AH-7921*

**Table S1.** Results obtained from cyclic voltammetry and exhaustive electrolysis for the considered compounds. Peak potential of the studied compounds evaluated by CV, potential applied for CPE and number of electron consumed during electrolysis. CV tests were performed at a concentration of 2.5 mM, in ethanol/0.1 M lithium perchlorate and 0.10 M 2,6-lutidine). Potentials are referred to Ag/AgCl, 3 M NaCl. Scan speed: 50 mV·s<sup>-1</sup>. Working electrode: glassy carbon, 2 mm diameter. As regards the CPE, all the tests were carried out at a concentration of 5 mM of analyte in ethanol containing 0.1 M lithium perchlorate and 2,6-lutidine (0.10 M).

| Compound | $E_{p1}$ / mV<br>CV | $E_p$ / mV<br>applied for CPE | e <sup>-</sup> /molecule<br>CPE |
|----------|---------------------|-------------------------------|---------------------------------|
| U-47700  | +980                | +1100                         | 1                               |
| AH-7921  | +1100               | +1200                         | 1                               |

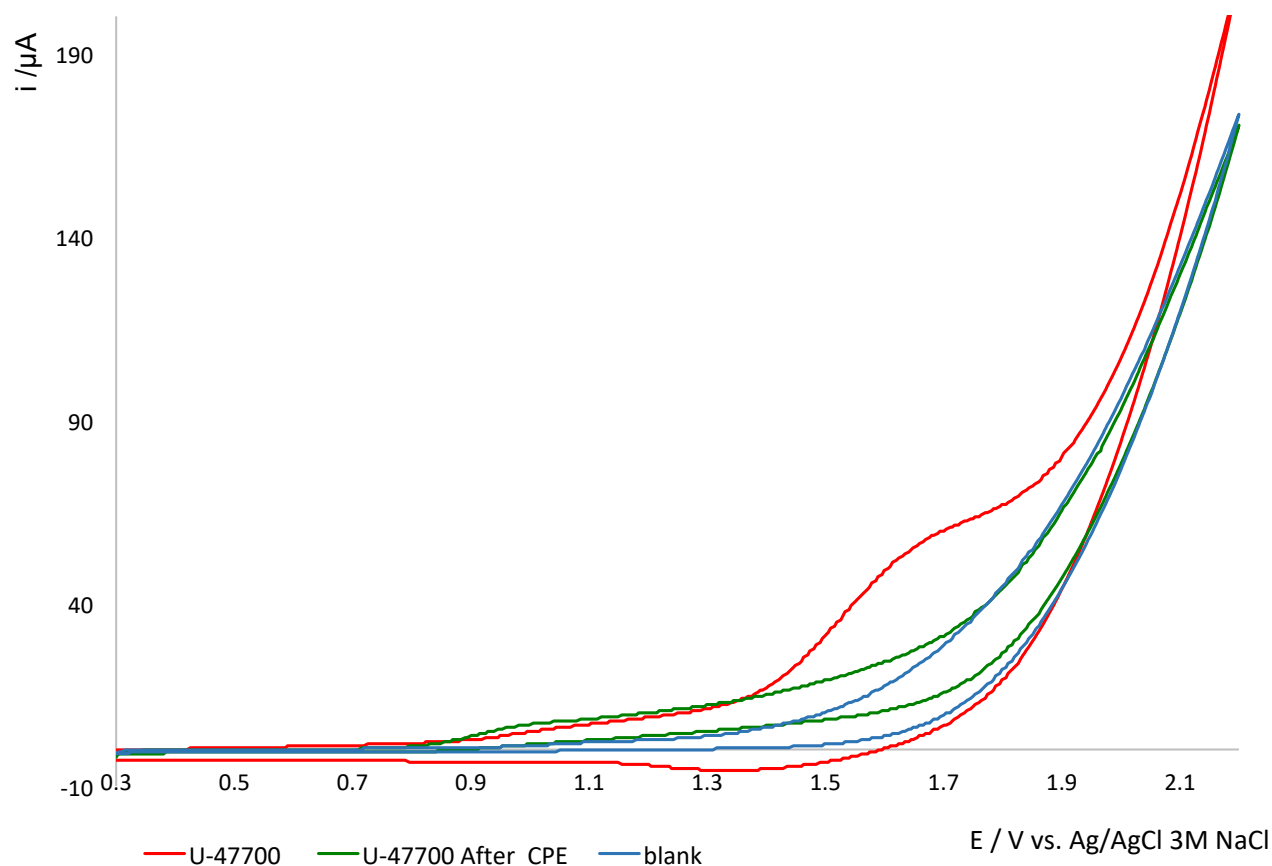

**Figure S2.** Comparison between the cyclic voltammograms of U-47700 obtained before (red curve), after exhaustive electrolysis conducted at +1100 mV (green curve). Cyclic voltammetry of U-47700 (2.5 mM, in ethanol/0.1 M lithium perchlorate and 0.10 M 2,6-lutidine). Potentials are referred to Ag/AgCl, 3M NaCl. Scan speed:  $50 \text{ mV}\cdot\text{s}^{-1}$ . Working electrode: glassy carbon, 2 mm diameter. Other conditions described in the text.

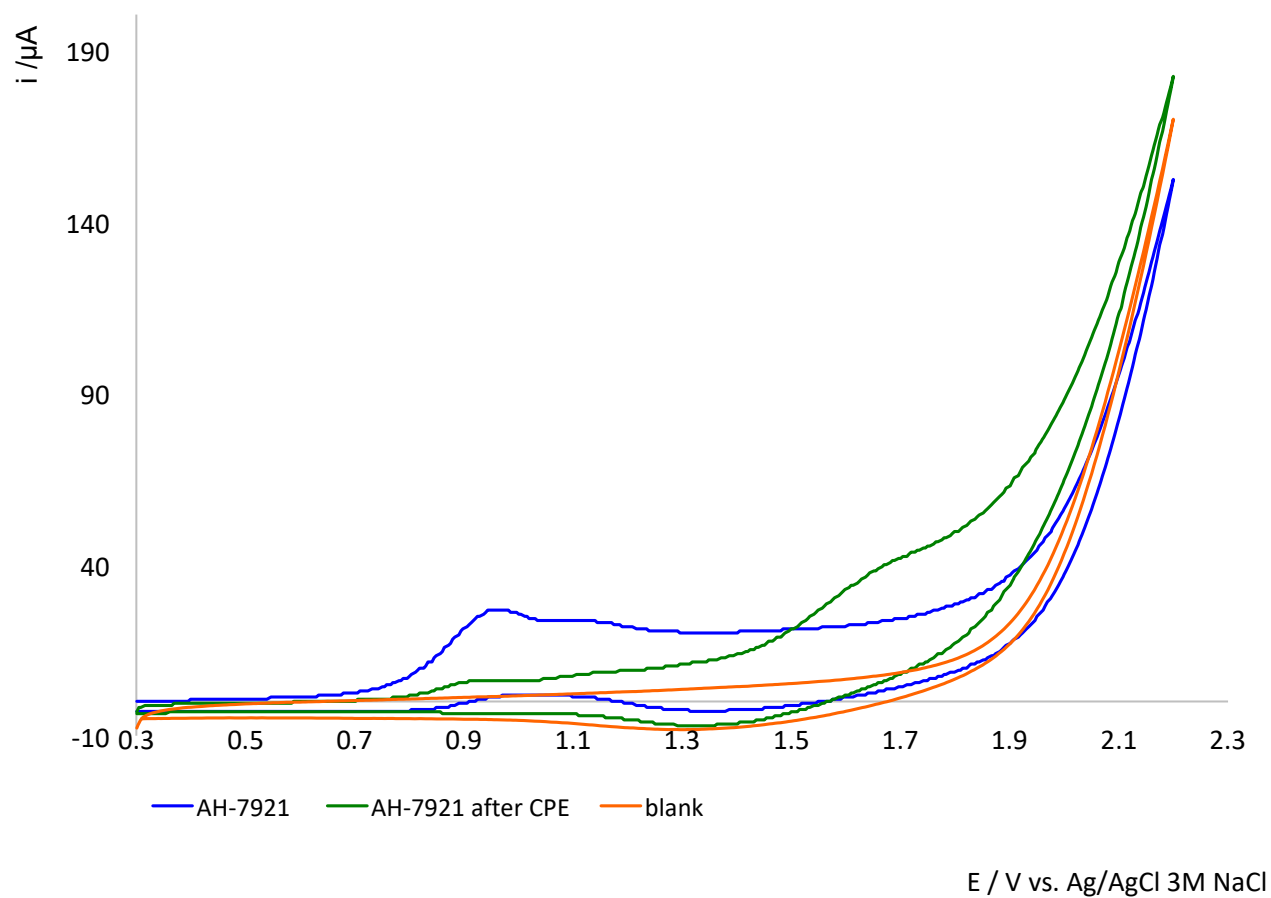

**Figure S3.** Comparison between the cyclic voltammograms of AH-7921 obtained before (blue curve), after exhaustive electrolysis conducted at +1200 mV (green curve). Cyclic voltammetry of AH-7921 (2.5 mM, in ethanol/0.1 M lithium perchlorate and 0.10 M 2,6-lutidine). Potentials are referred to Ag/AgCl, 3 M NaCl. Scan speed:  $50 \text{ mV}\cdot\text{s}^{-1}$ . Working electrode: glassy carbon, 2 mm diameter. Other conditions described in the text.

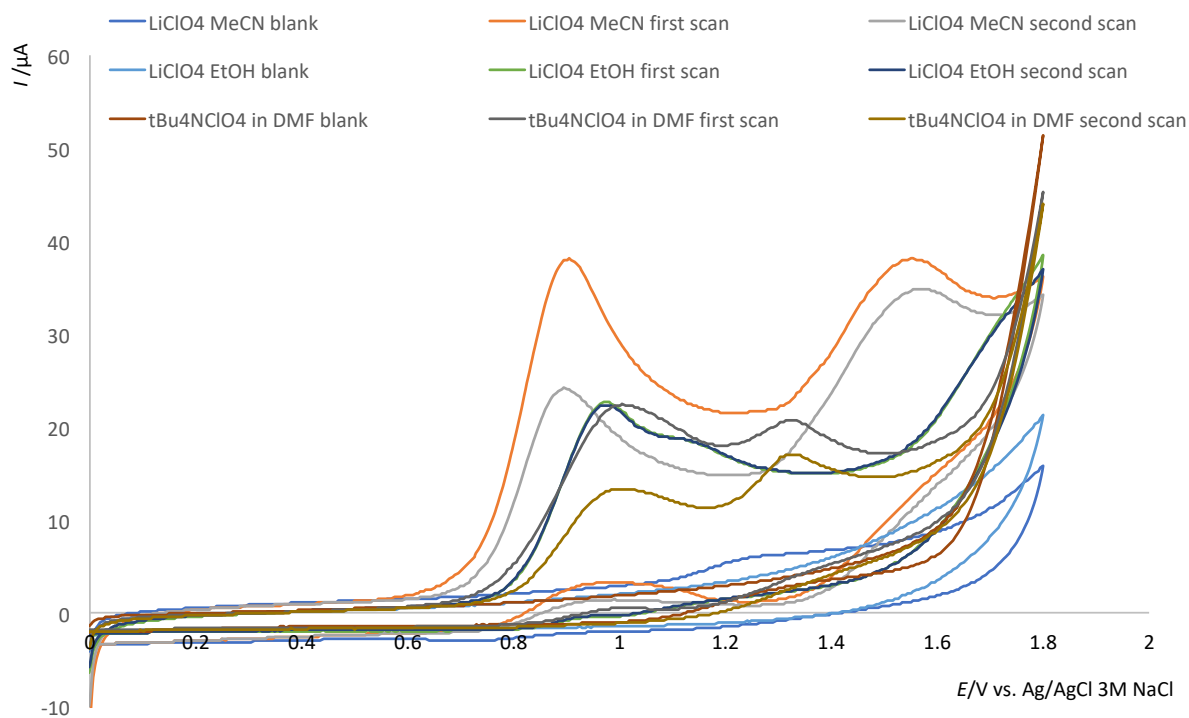

**Figure S4.** Effect of different combinations of supporting electrolytes and solvents on the CV curves of AH-7921 (scan speed:  $50 \text{ mV}\cdot\text{s}^{-1}$ , AH-7921 concentration  $2.5 \text{ mM}$ ). Potentials are referred to Ag/AgCl,  $3 \text{ M NaCl}$ . Working electrode: glassy carbon,  $2 \text{ mm}$  diameter. Other conditions described in the text.

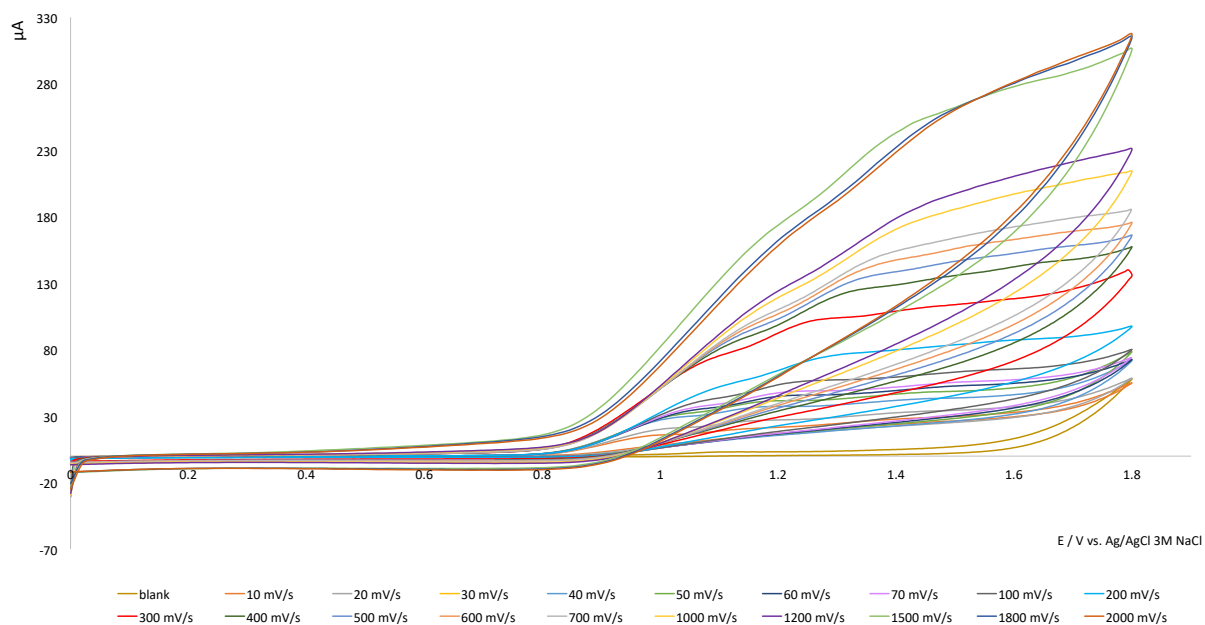

**Figure S5.** Cyclic voltammetry of U-47700 ( $2.5 \text{ mM}$ , in ethanol/ $0.1 \text{ M}$  lithium perchlorate and  $0.10 \text{ M}$  2,6-lutidine) at different scan speed. Potentials are referred to Ag/AgCl,  $3 \text{ M NaCl}$ . Working electrode: glassy carbon,  $2 \text{ mm}$  diameter. Other conditions described in the text.

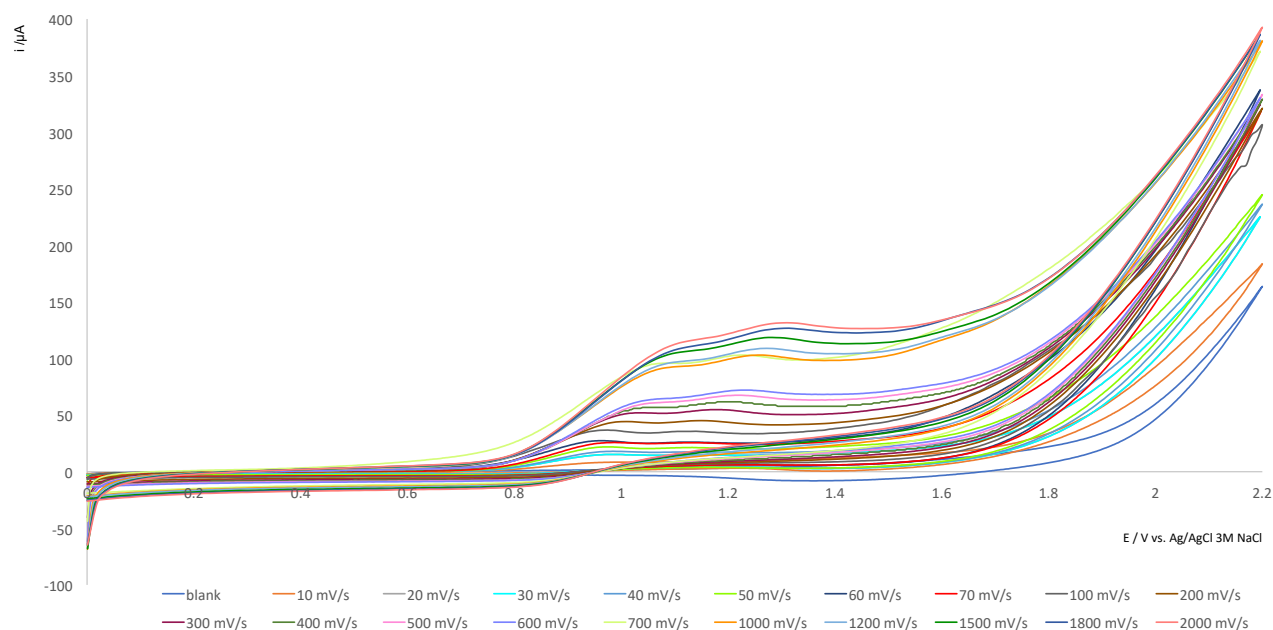

**Figure S6.** Cyclic voltammetry of AH-7921 (2.5 mM, in ethanol/0.1 M lithium perchlorate and 0.10 M 2,6-lutidine) at different scan speed. Potentials are referred to Ag/AgCl, 3 M NaCl. Working electrode: glassy carbon, 2 mm diameter. Other conditions described in the text.

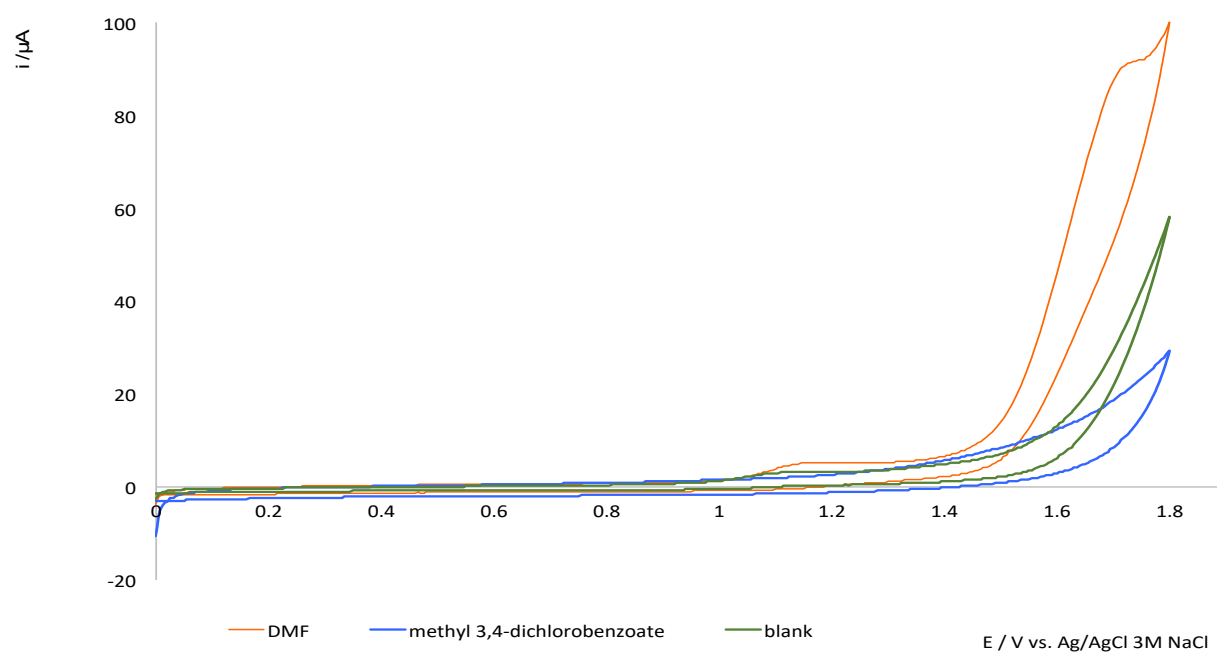

**Figure S7.** Cyclic voltammetry of DMF and methyl 3,4-dichlorobenzoate (2.5 mM, in ethanol/0.1 M lithium perchlorate and 0.10 M 2,6-lutidine). Potentials are referred to Ag/AgCl, 3 M NaCl. Scan speed: 50 mV·s<sup>-1</sup>. Working electrode: glassy carbon, 2 mm diameter. Other conditions described in the text.



#### 4. Electrochemical determination of aroyl amides

**Figure S8.** DPV of AH-7921 in ethanol/0.1 M lithium perchlorate and 0.10 M 2,6-lutidine and corresponding calibration curve; concentration range: from  $5 \mu\text{g}\cdot\text{mL}^{-1}$  to  $150 \mu\text{g}\cdot\text{mL}^{-1}$ , in presence of  $50 \mu\text{g}\cdot\text{mL}^{-1}$  of U-47700 (light green curve) and corresponding calibration curve. Potentials are referred to Ag/AgCl, 3M NaCl. Scan speed:  $50 \text{ mV}\cdot\text{s}^{-1}$ . Working electrode: glassy carbon, 2 mm diameter. Each point of the calibration curve corresponds to the voltammetric curve of the same colour.

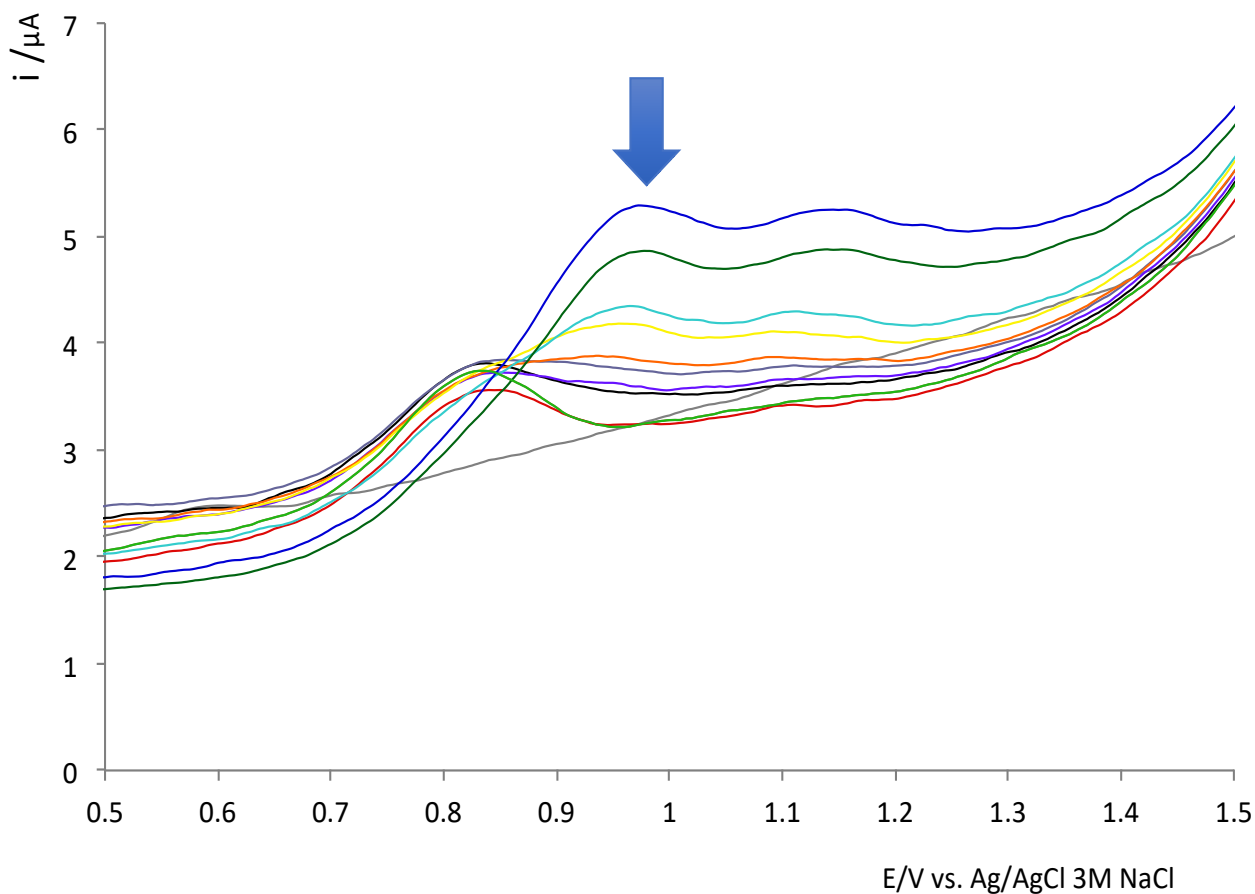

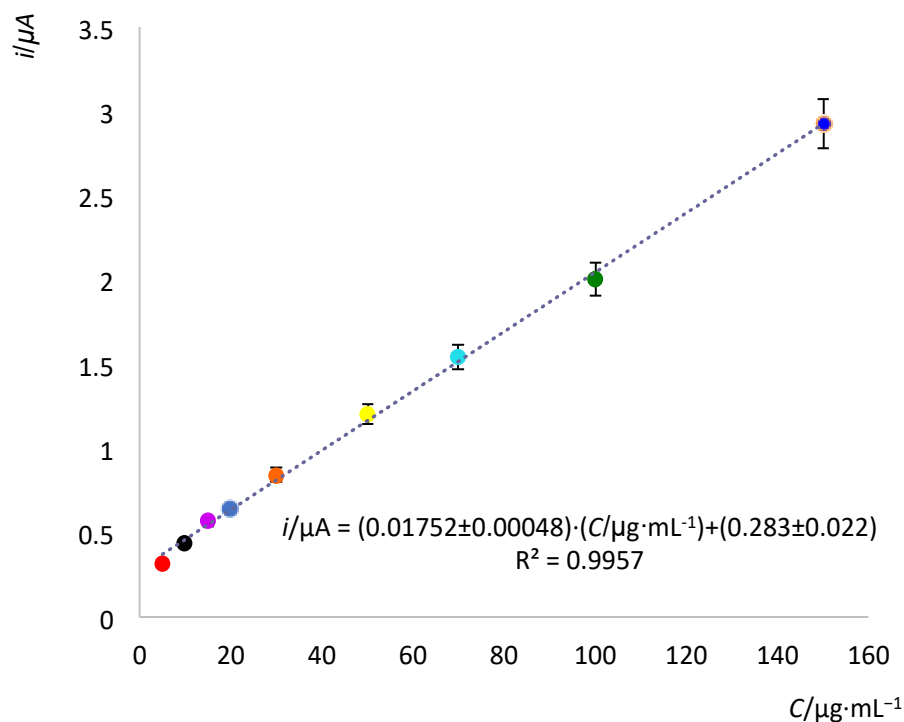

**Figure S9.** DPV of U-47700 in ethanol/0.1 M lithium perchlorate and 0.10 M 2,6-lutidine and corresponding calibration curve; concentration range: from 5  $\mu\text{g} \cdot \text{mL}^{-1}$  to 150  $\mu\text{g} \cdot \text{mL}^{-1}$ , in presence of 50  $\mu\text{g} \cdot \text{mL}^{-1}$  of AH-7921 (light green curve) and corresponding calibration curve. Potentials are referred to Ag/AgCl, 3M NaCl. Scan speed: 50  $\text{mV} \cdot \text{s}^{-1}$ . Working electrode: glassy carbon, 2 mm diameter. Each point of the calibration curve corresponds to the voltammetric curve of the same colour.

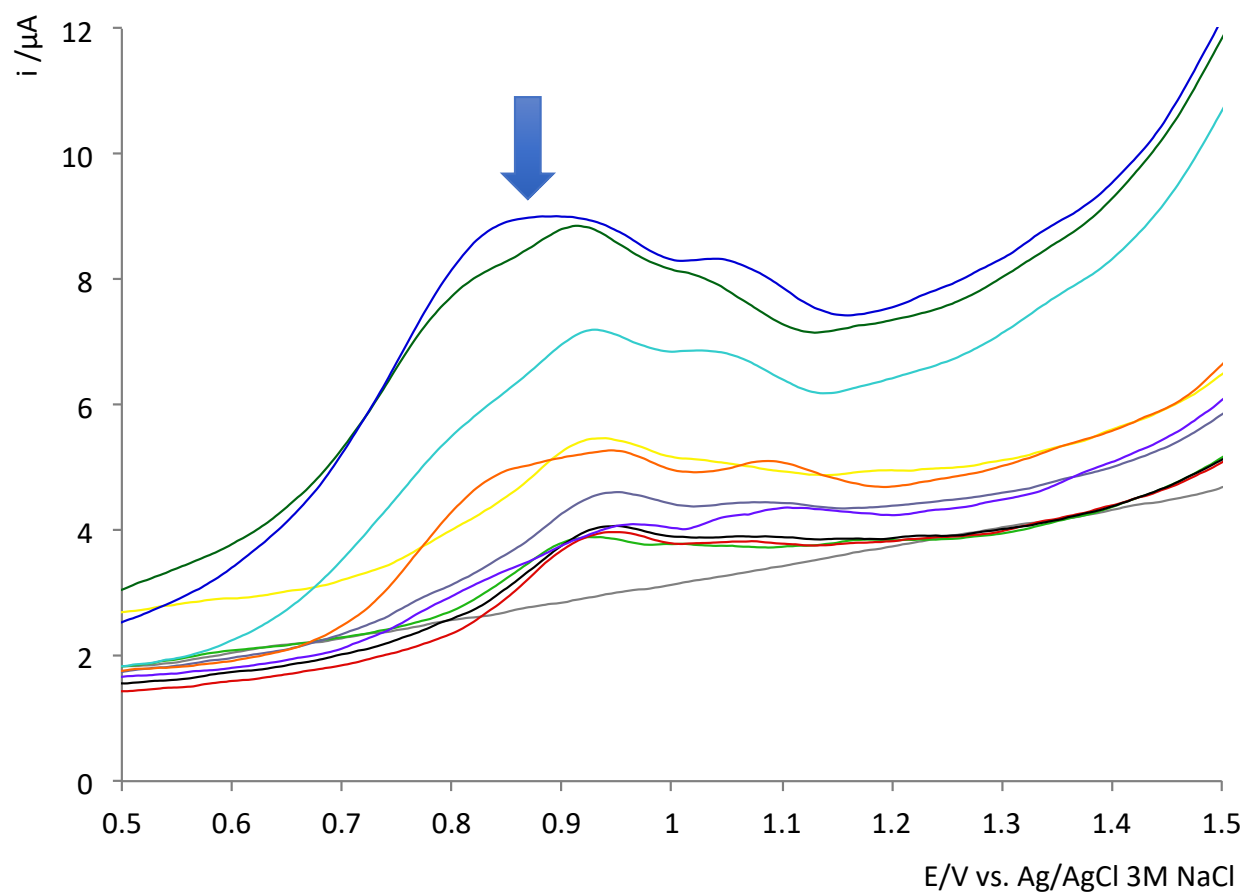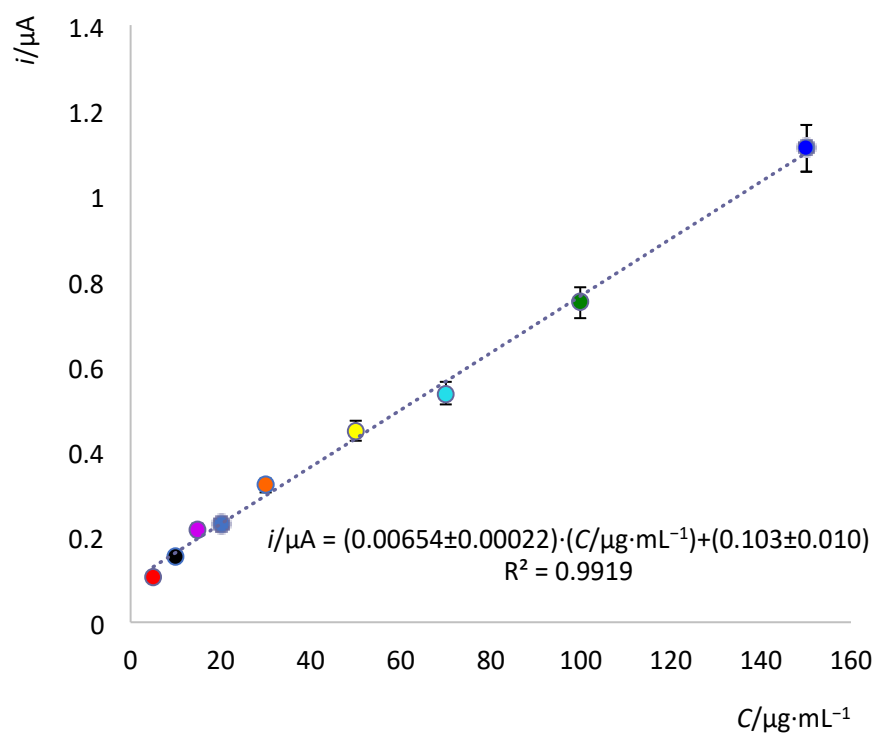

## 5. Synthetic urine composition

Human urine is mainly composed of water (95%), the rest being urea (2%), creatinine (0.1%), uric acid (0.03%), chloride, sodium, potassium, sulfate, ammonium, phosphate and other ions and molecules in smaller quantities.

The MP-AU24 protocol was followed for the formulation of synthetic urine [Sarigul, N.; Korkmaz, F.; Kurultak, İ. A New Artificial Urine Protocol to Better Imitate Human Urine. Sci. Rep. 2019, 9 (1), 20159. <https://doi.org/10.1038/s41598-019-56693-4>.], by dissolving the proper amount of the reported substance in 100 mL of distilled water; before use, the solution is filtered using a 0.45 µm Nylon filter.

| Component                                       | Formula                      | Amount (g/100 mL) |
|-------------------------------------------------|------------------------------|-------------------|
| <i>Sodium sulphate</i>                          | $Na_2SO_4$                   | 0.1700            |
| <i>Uric acid</i>                                | $C_5H_4N_4O_3$               | 0.0250            |
| <i>Sodium citrate tribasic dihydrate</i>        | $Na_3C_6H_5O_7 \cdot 2 H_2O$ | 0.0720            |
| <i>Creatinine</i>                               | $C_4H_7N_3O$                 | 0.0881            |
| <i>Urea</i>                                     | $CH_4N_2O$                   | 1.5000            |
| <i>Potassium chloride</i>                       | $KCl$                        | 0.2308            |
| <i>Sodium chloride</i>                          | $NaCl$                       | 0.1756            |
| <i>Calcium chloride</i>                         | $CaCl_2$                     | 0.0185            |
| <i>Ammonium chloride</i>                        | $NH_4Cl$                     | 0.1266            |
| <i>Sodium oxalate dibasic monohydrate</i>       | $Na_2C_2O_4 \cdot H_2O$      | 0.0035            |
| <i>Magnesium sulphate heptahydrate</i>          | $MgSO_4 \cdot 7 H_2O$        | 0.1082            |
| <i>Sodium dihydrogenphosphate dihydrate</i>     | $NaH_2PO_4 \cdot 2 H_2O$     | 0.2912            |
| <i>Disodium monohydrogenphosphate dihydrate</i> | $Na_2HPO_4 \cdot 2 H_2O$     | 0.0831            |

**Figure S10.** DPV scans of U-47700 ( $100\ \mu\text{g}\cdot\text{mL}^{-1}$ ) in presence of the various interfering substances: dextrose ( $5000\ \mu\text{g}\cdot\text{mL}^{-1}$ ), galactose ( $5000\ \mu\text{g}\cdot\text{mL}^{-1}$ ), lactose ( $5000\ \mu\text{g}\cdot\text{mL}^{-1}$ ), mannitol, ( $5000\ \mu\text{g}\cdot\text{mL}^{-1}$ ), glucose ( $5000\ \mu\text{g}\cdot\text{mL}^{-1}$ ), EDTA ( $50\ \mu\text{g}\cdot\text{mL}^{-1}$ ), amphetamine ( $50\ \mu\text{g}\cdot\text{mL}^{-1}$ ), dextrine ( $70\ \mu\text{g}\cdot\text{mL}^{-1}$ ). In all cases, a variation in peak intensity  $<10\%$  was found.

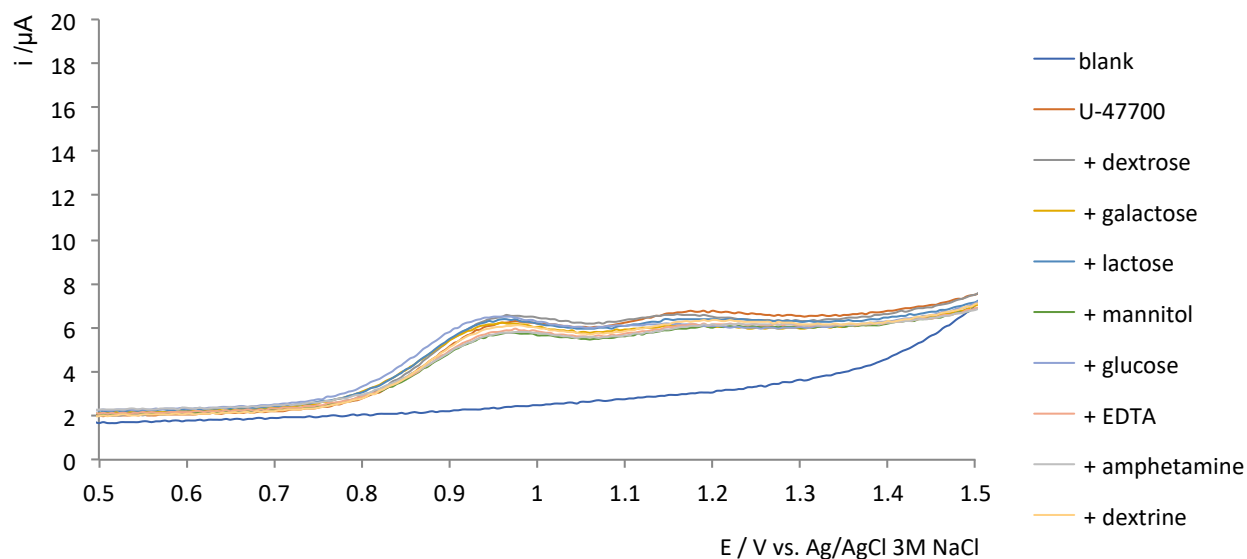

**Figure S11.** DPV scans of AH-7920 ( $100\ \mu\text{g}\cdot\text{mL}^{-1}$ ) in presence of the various interfering substances: dextrose ( $5000\ \mu\text{g}\cdot\text{mL}^{-1}$ ), galactose ( $5000\ \mu\text{g}\cdot\text{mL}^{-1}$ ), lactose ( $5000\ \mu\text{g}\cdot\text{mL}^{-1}$ ), mannitol, ( $5000\ \mu\text{g}\cdot\text{mL}^{-1}$ ), glucose ( $5000\ \mu\text{g}\cdot\text{mL}^{-1}$ ), EDTA ( $50\ \mu\text{g}\cdot\text{mL}^{-1}$ ), amphetamine ( $50\ \mu\text{g}\cdot\text{mL}^{-1}$ ), dextrine ( $70\ \mu\text{g}\cdot\text{mL}^{-1}$ ). In all cases, a variation in peak intensity  $<10\%$  was found.

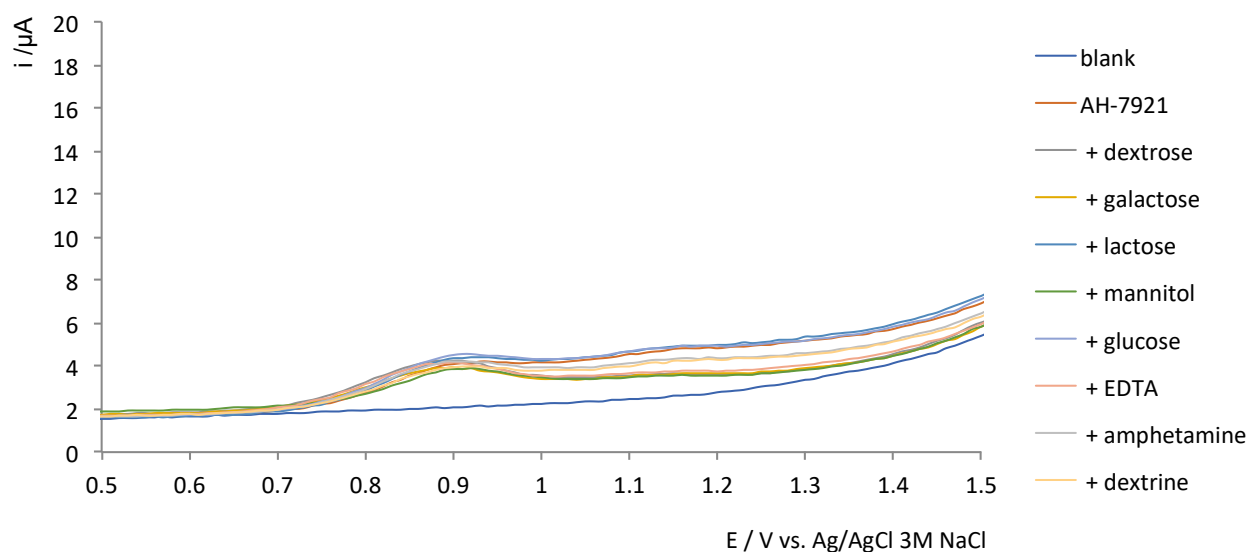

Supplement: s1 [file s1]
